# Supplementary material for: Patient Characteristics are not Associated with Clinically Important Differential Response to Dapagliflozin: a Staged Analysis of Phase 3 Data
Source: PubMed Central journal article supplement — Diabetes Ther. 2014 Dec 12;5(2):471–82. doi: 10.1007/s13300-014-0090-y (PMC4269640; doi:10.1007/s13300-014-0090-y), 2014-12-12
Supplement: 13300_2014_90_MOESM1_ESM.pdf [file 13300_2014_90_MOESM1_ESM.pdf]

- A systematic process of data mining and statistical modeling was used to determine if reproducible predictors of treatment response to dapagliflozin could be identified in a phase 3 clinical dataset.
- Baseline glycated hemoglobin (HbA<sub>1c</sub>) was the variable most strongly associated with reduction in HbA<sub>1c</sub> at study end, but this result was not specific to dapagliflozin.
- Baseline fasting plasma glucose was identified as a reproducible predictor of treatment response to dapagliflozin, although the effect size, as determined by metaanalysis of 9 studies from the dapagliflozin clinical trial program, was too small to be clinically relevant.
- The identification of a dapagliflozin-specific predictor through modeling supports the utility of data mining large clinical datasets for reproducible predictors of treatment response.
- These findings support potential benefit for dapagliflozin treatment that is consistent with current recommended use.

This summary slide represents the opinions of the authors. Sponsorship for this study was funded by AstraZeneca. Medical writing assistance for this study was provided by Ray Ashton and Bill Kadish of PPSI (a PAREXEL company). For a full list of acknowledgments and conflicts of interest for all authors of this article, please see the full text online. Copyright © The Authors 2014. Creative Commons Attribution Noncommercial License (CC BY-NC).
